# Supplementary material for: Water turbidity sensing using a smartphone
Source: Royal Society of Chemistry journal article supplement (doi:10.1039/c6ra02483a), 2016-01-01
Supplement: c6ra02483a1.pdf [file c6ra02483a1.pdf]

Supplementary Information

# WATER TURBIDITY SENSING USING A SMARTPHONE

I. Hussain<sup>1</sup>, K. Ahamad<sup>2</sup> and P. Nath<sup>1</sup>

<sup>1</sup>Applied Photonics and Nanophotonics Laboratory, Department of Physics, Tezpur University,  
Napaam 784028, India

<sup>2</sup>Department of Civil engineering, Tezpur University, Napaam 784028, India  
Corresponding author: pnath@tezu.ernet.in

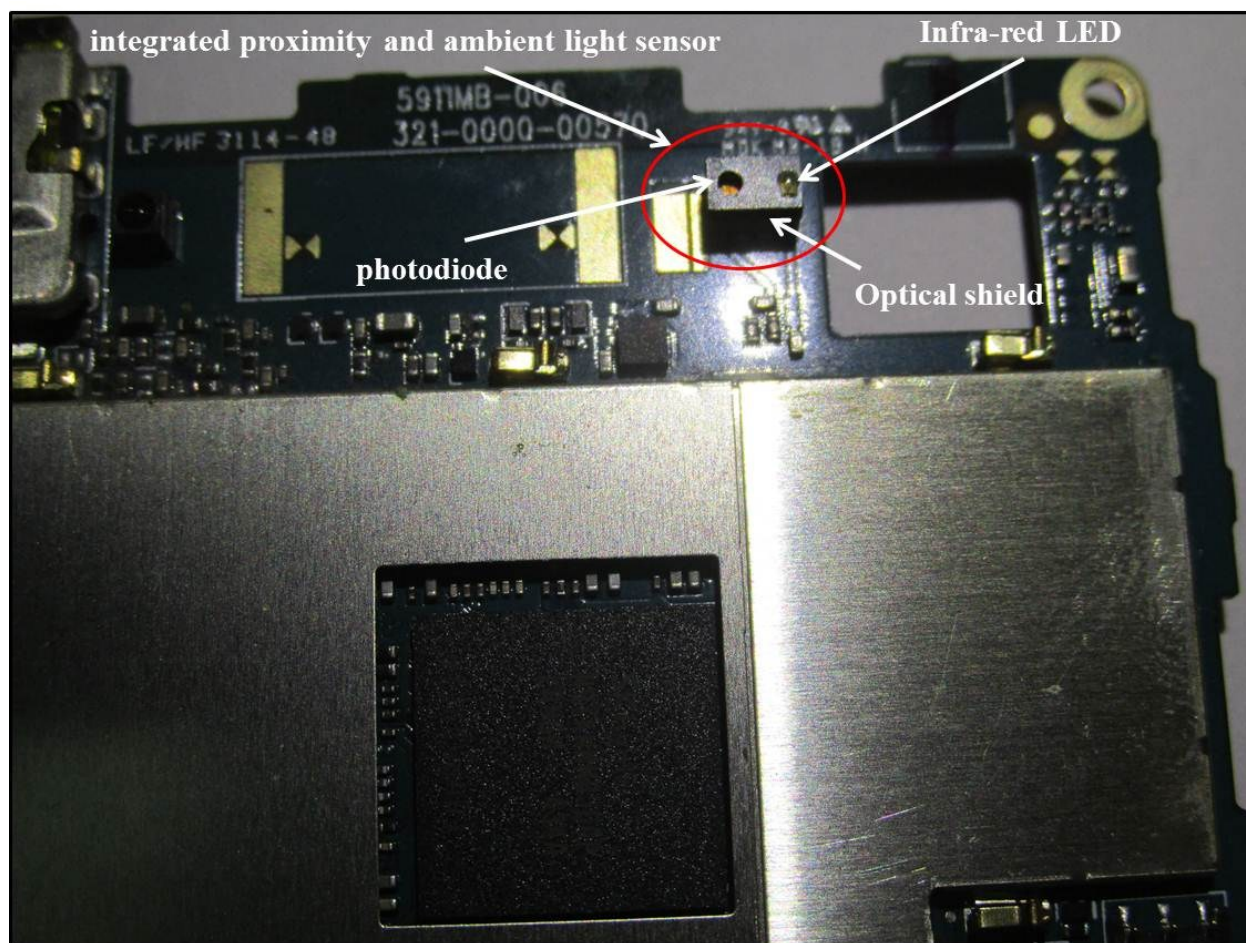

**Fig.S1.** A Photograph of Sony Xperia E3 sensor chip indicating the built-in integrated proximity and light sensor module.

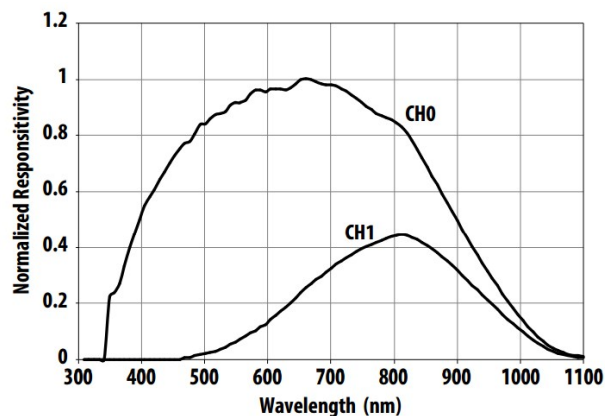

(a)

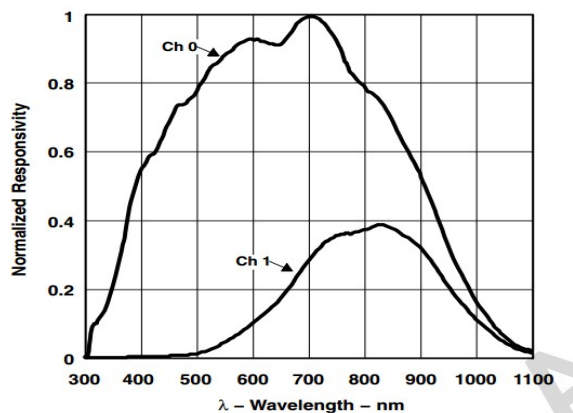

(b)

**Fig.S2.** Spectral response curve of Avago APDS-9930 and (b) ams AG (TAOS) TMD2771 integrated proximity and ambient light sensor where Ch0 photodiode is both visible and infrared and Ch1 is infrared-responding photodiode.

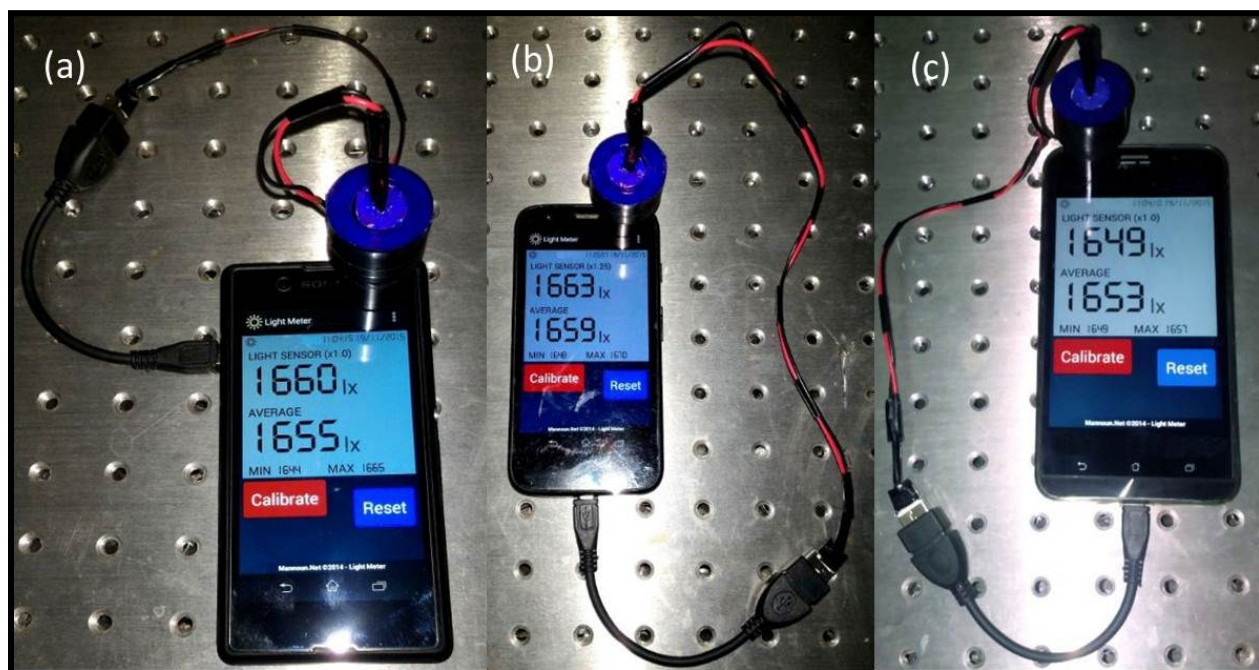

**Fig.S3.** A Photograph of Smartphones with installed light meter app for intensity measurement (a) Sony Xperia E3, Android OS, v4.4.2 (KitKat), (b) Moto G xt1033, Android OS, v4.3 and (c) Asus Zenfone2 Android OS, v5.0 (Lollipop).

**Table S1** Specification of the phone used (Sony Xperia E3)

| ITEM             | SPECIFICATION                         |
|------------------|---------------------------------------|
| Model            | D2202                                 |
| Operating system | Android OS, v4.4.2 (KitKat)           |
| Chipset          | Qualcomm MSM8926-2 Snapdragon 400     |
| CPU              | Quad-core 1.2 GHz Cortex-A7           |
| Ram              | 1 GB                                  |
| USB              | Micro USB v2.0, USB Host              |
| Sensors          | Accelerometer, proximity, compass     |
| Battery          | Non-removable Li-Ion 2330 mAh battery |
| Dimension        | 137.1 x 69.4 x 8.5 mm                 |
| Weight           | 143.8 g                               |

**Table S2** List of optical components and their cost involved

| COMPONENTS           | SUPPLIER/PARTS NO.              | COST (U.S. \$)   |
|----------------------|---------------------------------|------------------|
| 1. Infra-red LED     | Product no. L12756 Hamamatsu    | 3.29             |
| 2. Plano-Convex Lens | product no.32-404 Edmund Optics | 25               |
| 3. USB-OTG cable     | Ebay.in                         | 0.59             |
| 4. 1 mm pinhole      | product no.56-291 Edmund Optics | 57.00            |
|                      |                                 | Total = \$ 85.88 |

**Calculations for scattering angle:** Considering a particle P at the centre of the sample holder. The distance between the 1 mm pinhole and particle is 25 mm. The maximum deviation of scattered light from its 90° path is given by :

$$\tan^{-1}(\text{Radius of the pinhole} / \text{distance between pin hole and the particle}) = \pm \tan^{-1}(0.5 \text{ mm} / 25\text{mm})$$
$$= \pm 1.14^{\circ}$$

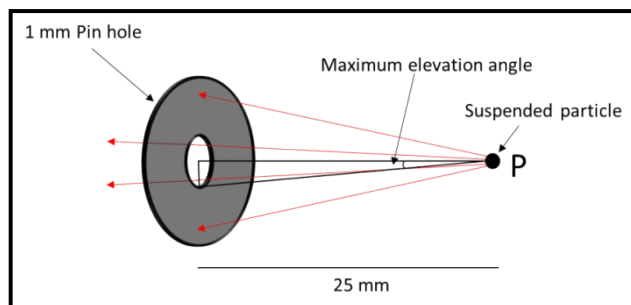

**Fig.S4.** Schematic diagram for calculation of scattering angle in the present work.
